# Supplementary material for: Pre-Pregnancy BMI Influences the Association of Dietary Quality and Gestational Weight Gain: The SECOST Study
Source: PubMed Central journal article supplement (PMC6801791; doi:10.3390/ijerph16193735), 2019-10-04
Supplement: ijerph-16-03735-s001.pdf [file ijerph-16-03735-s001.pdf]

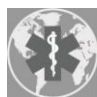

**Table S1.** Component score and total score for Healthy Eating Index (HEI) for Malaysians among the respondents.

|                            | Possible range of score | Criteria for a minimum score of 0 | Criteria for a maximum score of 10 |
|----------------------------|-------------------------|-----------------------------------|------------------------------------|
| HEI Component              |                         |                                   |                                    |
| Cereals and grains         | 0 to 10                 | 0 or > 8 serving                  | 6 – 8 servings                     |
| Vegetables                 | 0 to 10                 | 0 serving                         | 3 servings                         |
| Fruits                     | 0 to 10                 | 0 or > 2 serving                  | 2 servings                         |
| Milk and milk products     | 0 to 10                 | 0 or > 3 serving                  | 2 – 3 servings                     |
| Poultry, meat, and egg     | 0 to 10                 | 0 or > 2 serving                  | 1 – 2 servings                     |
| Fish and seafood           | 0 to 10                 | 0 or > 1 serving                  | 1 serving                          |
| Legumes                    | 0 to 10                 | 0 or > 1 serving                  | 1 serving                          |
| % of energy from total fat | 0 to 10                 | ≥ 35% energy from fat             | ≤ 30% energy from fat              |
| Sodium                     | 0 to 10                 | ≥ 4200 mg                         | ≤ 2000 mg                          |
| Total HEI                  | 0 to 100                |                                   |                                    |

Note. If individuals less or exceed of the recommended servings, the score was calculated proportionately between 0 and 10. If an individual consumed less than the recommended amount of servings, the score was calculated with the following formula:  $10 \times (\text{the consumed amount of servings}) / (\text{the lower limit of the recommended serving})$ . If an individual consumed more than the recommended amount of servings, the score was calculated with the following formula:  $10 - 10 \times [(\text{the consumed amount of servings}) - (\text{the upper limit of the recommended amount})] / (\text{the upper limit of the recommended amount})$ . Each score was rounded off to the nearest whole number. When this calculation produced a negative score because of excess servings, the score was converted to 0.
